# Supplementary material
Source: PubMed Central journal article supplement (PMC3907760)
Supplement: supp_blood-2013-10-530725_blood-2013-10-530725-1.pdf [file supp_blood-2013-10-530725_blood-2013-10-530725-1.pdf]

## Supplemental Methods and Figures

### *The pAAVS1-Gp1ba construct*

The proximal 2.6 kb of the murine *Gp1ba* promoter followed by its 5' UTR/1<sup>st</sup> intron had been previously spliced to the SV40 splice acceptor/5' UTR followed by a coding region of interest and then the SV40 3' UTR and polyadenylation signal and used in transgenic mice models to express human factor VIII in platelets<sup>1</sup>. This expression construct was now cloned into the Sal1 restriction site of the AAVS1 targeting plasmid (Addgene; *pAAVS1-SA-2A-puro-pA* donor) using the iProof High Fidelity DNA Polymerase (BioRad) and In-Fusion Advantage PCR Cloning kit (Clontech) according to the manufacturers instructions. The coding region of the *Gp1ba* promoter construct was replaced with either eGFP (Addgene pFUGW) or  $\alpha$ IIb cDNA<sup>2</sup> by restriction digestion and PCR/In-fusion at the labeled Not1 sites (Supplemental Figure 2A). The additional Not1 site in the *pAAVS1-SA-2A-puro-pA* donor backbone was mutated by PCR overlap<sup>3</sup> for facile cloning.

### *Cell culture*

Induced pluripotent stem (iPS) cells were maintained in human ES (hES) media: DMEM/F12 (Gibco) containing 20% knockout serum replacement (Gibco), 2 mM L-glutamine (Cellgro), 1,000 IU/mL penicillin/ 1mg/mL streptomycin (P/S, Cellgro, 100x), 1X non-essential amino acids (Gibco, 100x), 0.5 mM sodium pyruvate (Gibco), 0.12% sodium bicarbonate (Gibco), 0.1 mM  $\beta$ -mercaptoethanol (Gibco), and 10 ng/mL basic fibroblast growth factor (R&D Systems). All iPS cell lines were maintained on 0.1% gelatin (Sigma) coated 6-well culture plates containing irradiated mouse embryonic fibroblasts (iMEFs). Cultures were split every 3-5 days after incubation with TrypLE (Invitrogen) for 3-4 minutes, and then mechanically disaggregated and plated on fresh iMEFs with 10  $\mu$ M Rock inhibitor (Cayman Chemical). Cultures were maintained at 37°C, 5% CO<sub>2</sub>, 5% O<sub>2</sub>, and 90% (vol/vol) N<sub>2</sub>.

### *Generation of iPS cells*

Peripheral blood from a healthy control (WTPB2-3/Control 1) and two patients with Type I GT (GTPB1-1/GTP1, GTPB2-1/GTP2) was collected, expanded, and reprogrammed as described<sup>4</sup>. CD34(+)-selected bone marrow cells were purchased from the Stem Cell Core at the University of Pennsylvania and used to generate a control iPS cell line (WTBM1-8/Control 2) as described<sup>5</sup>. Briefly, mononuclear cells were infected with lentiviral vectors pHAGE-Tet-hSTEMCCA and pHAGE2-CMV-rTTA encoding the reprogramming genes OCT4/SOX2/KLF4/MYC and reverse tetracycline transactivator protein (rTTA), respectively<sup>6</sup>. The iPS cell lines were generated in the presence of doxycycline 1  $\mu$ g/mL starting Day 1 of reprogramming and removed when iPS cell clones were selected to silence reprogramming gene expression.

To establish iPSC cell lines, doxycycline-resistant clones were handpicked about 2-3 weeks post-infection based on cell morphology and size. Clones were subsequently passaged and expanded in hES medium for a minimum of 20 passages to erase residual epigenetic memory<sup>7</sup>. Characterization of the clones included karyotype, teratoma formation, flow cytometry for pluripotency surface markers (SSEA3/4, TRA-1-81 and TRA-1-60), and qPCR analysis for pluripotency gene expression (Supplemental Figure 1).

*RNA isolation and real-time quantitative PCR analysis*

The qPCR procedure and primers for iPSC cell pluripotency characterization are listed in Mills et al<sup>8</sup>. Additional primer sequences for the housekeeping gene cyclophilin, transgene construct (SV40 5' UTR), and megakaryocytes are as follows:

**CYCLOPHILIN:**

F' 5'-GAAGAGTGCGATCAAGAACCCATGAC-3'

R' 5'-GTCTCTCCTCCTTCTCCTCCTATCTTTACTT-3'

**SV40 5' UTR:**

F' 5'-CCGGTGGTGGTGCAAATCAAAGAA-3'

R' 5'-AGCAGAAGTAACACTTCCGTACAGGC-3'

**ITGA2B:**

F' 5'-GCTTTGGGTTGGAGCTGTTCCATT-3'

R' 5'-GGGCTCAGTCTCTTTATTAGGCAGCA-3'

**ITGB3:**

F' 5'-TCTACCTCTTGGCTGCCTTGTGAA-3'

R' 5'-ACACGTGCTGATACTGACCCA-3'

**GP1BA:**

F' 5'-GCACACAATTTTCAGTCCCAGCCAA-3'

R' 5'-TGGGAACCATGCTGTATTCTGCCA-3'

**GP1BB:**

F' 5'-TTTCTTCCGTTGTGAATGCCGCGT-3'

R' 5'-TGCAGCGGCAGATAGCACACTA-3'

**GP9:**

F' 5'-TGTATCCCATAGAGTTGCCACCCA-3'

R' 5'-TGTGAAGCCTTTGGTCAGGTGCT-3'.

### *Targeting the AAVS1 locus in iPS cells*

AAVS1-specific ZFN sequences were cloned into an expression vector under the control of the PGK promoter (*pPGK-ZFN-L* and *pPGK-ZFN-R*)<sup>9</sup>. Pluripotent stem cells were transiently transfected with both ZFN plasmids and the AAVS1 donor plasmid containing the *Gp1ba* promoter construct driving either eGFP or  $\alpha$ IIb cDNA. Approximately  $1 \times 10^5$  iPS cells/well were plated onto puromycin-resistant DR4 MEFs (GlobalStem) with 10  $\mu$ M Rock inhibitor in a 1:3 Matrigel (BD Biosciences) coated 6-well culture dish and then re-fed the next morning with hES media with 20 ng/mL of bFGF without P/S. The donor pAAVS1-*Gp1ba* construct (3  $\mu$ g), 1  $\mu$ g of each ZFN plasmid, and 4  $\mu$ L of Plus reagent (Invitrogen) were added to 250  $\mu$ L of DMEM/F12 and incubated at RT for 5 minutes (use sterile plasmids at  $\sim 1$   $\mu$ g/ $\mu$ L in tissue culture grade water). A total of 16  $\mu$ L of Lipofectamine LTX (Invitrogen) was added to 250  $\mu$ L of DMEM/F12, which was then combined with the 250  $\mu$ L DNA/Plus mixture and incubated at RT for 30 minutes. The transfection mixture (500  $\mu$ L) was then added drop wise per well and incubated 4-6 hours at 37°C and then washed and re-fed with hES media. Puromycin selection (0.5  $\mu$ g/mL) was added 24-48 hours later for  $\sim 3$ -4 days. After  $\sim 1$ -2 weeks individual puromycin-resistant clones were hand picked and expanded.

### *Southern blot for AAVS1 targeting*

To detect a single, hemizygous insertion at the AAVS1 locus, a 480 bp internal 5' probe aligned with the left homology arm (HA-L, Supplemental Figure 2B) was synthesized by a BamH1 restriction digest of 100  $\mu$ g of *pAAVS1-SA-2A-puro-pA* donor plasmid. The probe was extracted using the Qiaquick PCR Purification Kit (Qiagen) and <sup>32</sup>P labeled using the Prime-It II Random Primer Labeling Kit (Agilent). Southern blotting was performed on an Sph1 restriction digest (Supplemental Figure 2B) of 10  $\mu$ g of genomic DNA extracted using the DNeasy Blood and Tissue Kit (Qiagen). A targeted insertion within the AAVS1 locus (Supplemental Figure 2C) was detected by the 5' probe as a 3.8 kb fragment<sup>9</sup>. A non-targeted allele was detected as a 6.5 kb fragment. Hemizygous insertions contained both the 6.5 and 3.8 kb fragments. Homozygous insertions only contained a single 3.8 kb fragment. Fragments of other sizes represent off-target insertions. The *pAAVS1-SA-2A-puro-pA* donor plasmid contains a second Sph1 restriction site outside of the HA-L, which gives a 4.3 kb plasmid-derived fragment due to non-homologous insertion of the plasmid DNA<sup>10</sup>.

### *Hematopoietic differentiation*

iPS cells were feeder depleted and differentiated into hematopoietic cells on 1:3 Matrigel coated 6-well plates using a previously described serum free, adherent monolayer protocol<sup>8</sup>. Adult enriched CD34+ bone marrow cells were differentiated into megakaryocytes as previously described<sup>11</sup>.

### *Flow cytometry*

Antibodies used included anti-CD41a phycoerythrin (PE), anti-CD41a allophycocyanin (APC), anti-CD42a PE, anti-CD235a APC, anti-CD18 APC, anti-Tra-1-60 PE (BD Biosciences); anti-CD31 PE-Cyanine7, anti-CD45 Pacific blue, anti-SSEA-3 AlexaFluor 488, anti-SSEA-4 AlexaFluor 647, anti-Tra-1-81 AlexaFluor 647 (BioLegend); anti-KDR PE (R&D). Cells were stained as previously described<sup>8</sup> and analyzed on a FacsCanto (BD Biosciences) with FlowJo software (Tree Star).

### *PAC-1 and fibrinogen binding*

Megakaryocytes spun at 200 RCF for 5 minutes and re-suspended in Tyrode's salt solution (Sigma) with 0.1% bovine serum albumin (BSA) at room temperature (RT) to a final concentration of  $\sim 1-4 \times 10^6$  cells/mL. The cells were added to 5 mL polystyrene tubes containing 2  $\mu$ L CD42a PE,  $\pm$  10  $\mu$ M tirofiban,  $\pm$  10  $\mu$ M ethylenediaminetetraacetic acid (Invitrogen), 10  $\mu$ g/mL of AlexaFluor 647-conjugated fibrinogen (Molecular Probes) or 10  $\mu$ L PAC-1 Fluorescein isothiocyanate (BD Biosciences), and convulxin (Enzo) 500 ng/mL to give a final reaction volume of 50  $\mu$ L. The tubes were incubated for 15 minutes at RT, then placed on ice and diluted with 450  $\mu$ L of ice-cold Tyrode's salt solution with 0.1% BSA. Fibrinogen and PAC-1 binding were analyzed by flow cytometry<sup>12,13</sup>.

### *Western blots*

Megakaryocytes were lysed with 1% Triton-X100 lysis buffer (150 mM NaCl, 1% TX-100, 0.02% NaN<sub>3</sub>, 0.01M Tris [tris(hydroxymethyl) aminomethane] buffer pH 8.0). Lysate protein concentrations were determined using the bicinchoninic acid protein assay. Sodium dodecyl sulfate (SDS) loading buffer was mixed with protein samples and loaded into 4-12% precast gels (Invitrogen). Proteins were separated by SDS polyacrylamide gel electrophoresis and transferred onto polyvinylidene fluoride membranes. Membranes were blocked in 5% nonfat dry milk in PBS with Tween 20 (PBST) for 1 hour at RT, followed by primary antibody incubation in 1% nonfat dry milk in PBST overnight at 4°C. Membranes were washed with PBST for 15 minutes 3 times to remove excess antibody. Incubation with the appropriate secondary antibody conjugated to horseradish peroxidase at a 1:10000 dilution was done at RT for 1 hour. After 3 washes with PBST, membranes were developed using the ECL Plus detection system. Antibodies used: anti-rabbit polyclonal SEW-8 anti- $\alpha$ IIb (0.6  $\mu$ g/mL); mouse monoclonal  $\beta$ 3 (1:200, Santa Cruz Biotechnology, sc-365679); anti-mouse monoclonal  $\beta$ -actin (1:100,000, Sigma-Aldrich, A1978); Peroxidase-AffiniPure goat anti-rabbit IgG (1:10,000, Jackson ImmunoResearch, 111-035-003); and Peroxidase-AffiniPure goat anti-mouse IgG (1:10,000, Jackson ImmunoResearch, 115-035-003).

**Sullivan et al. Supplemental Figure 1**

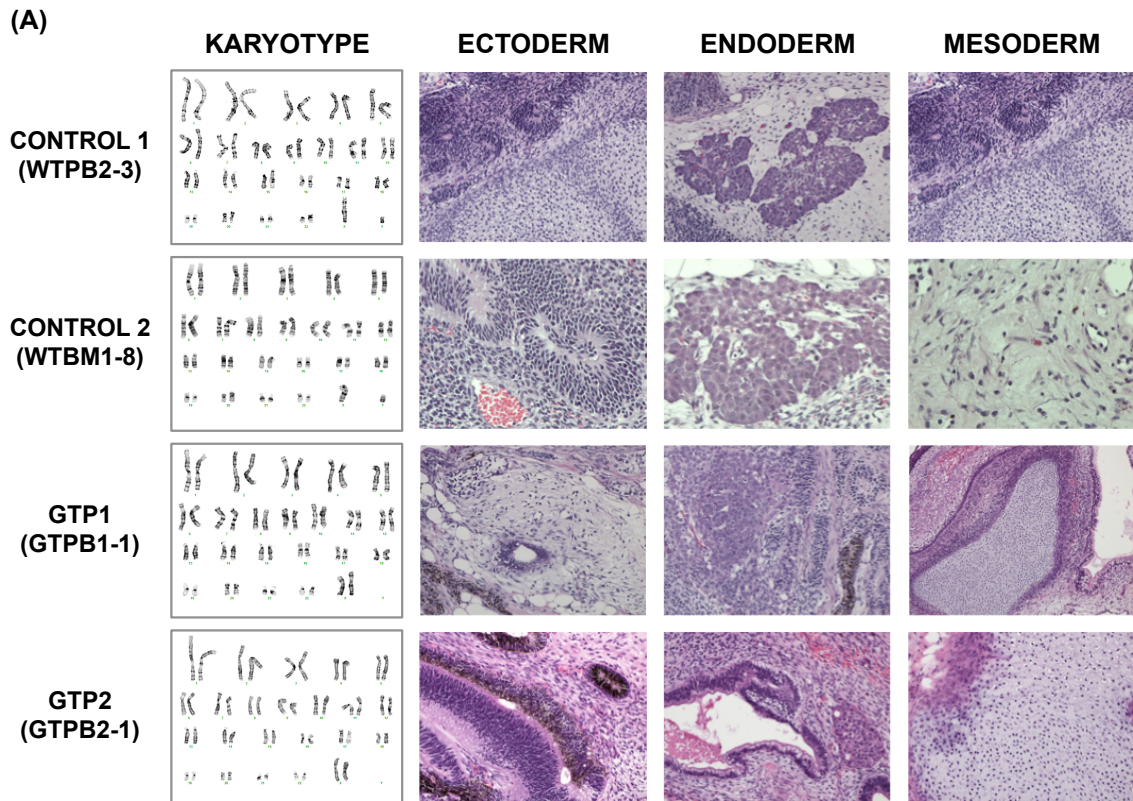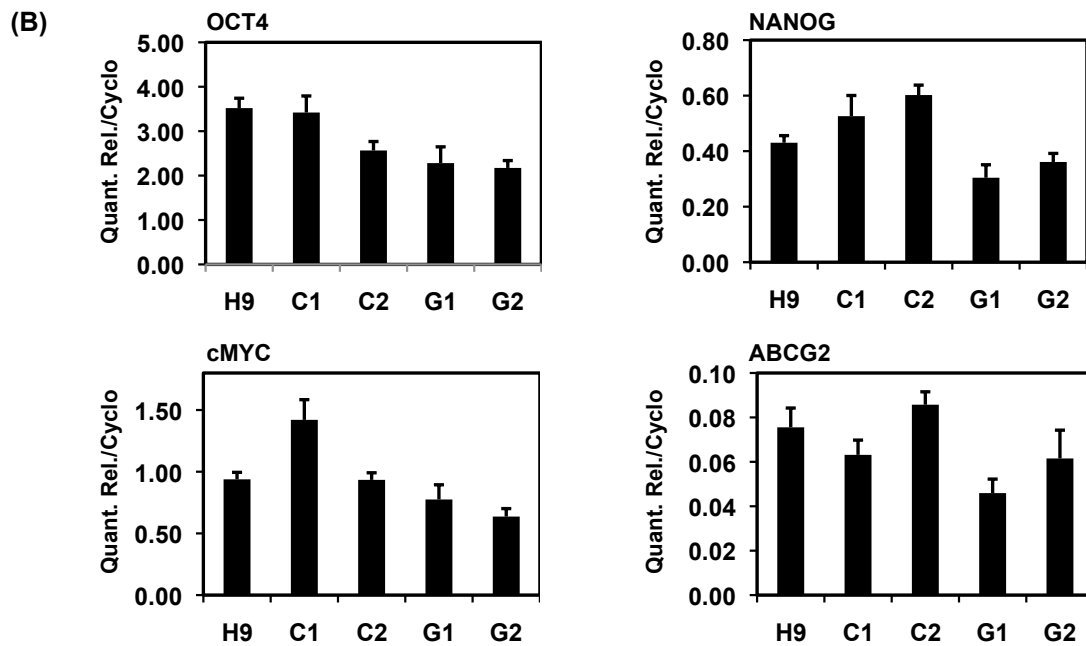

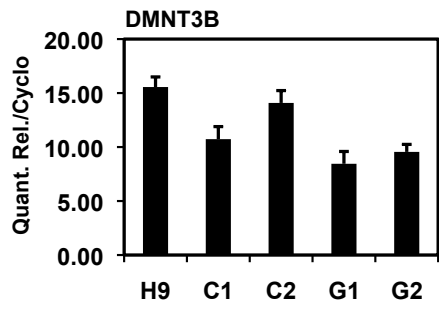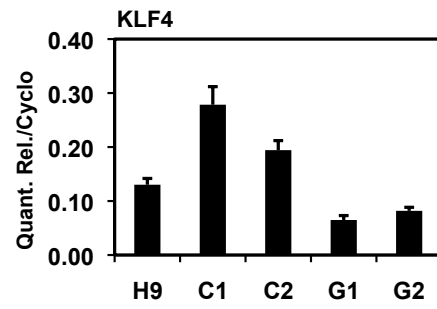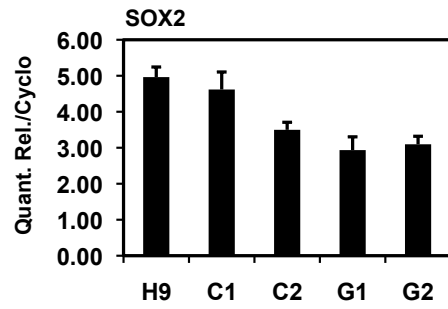

(C)

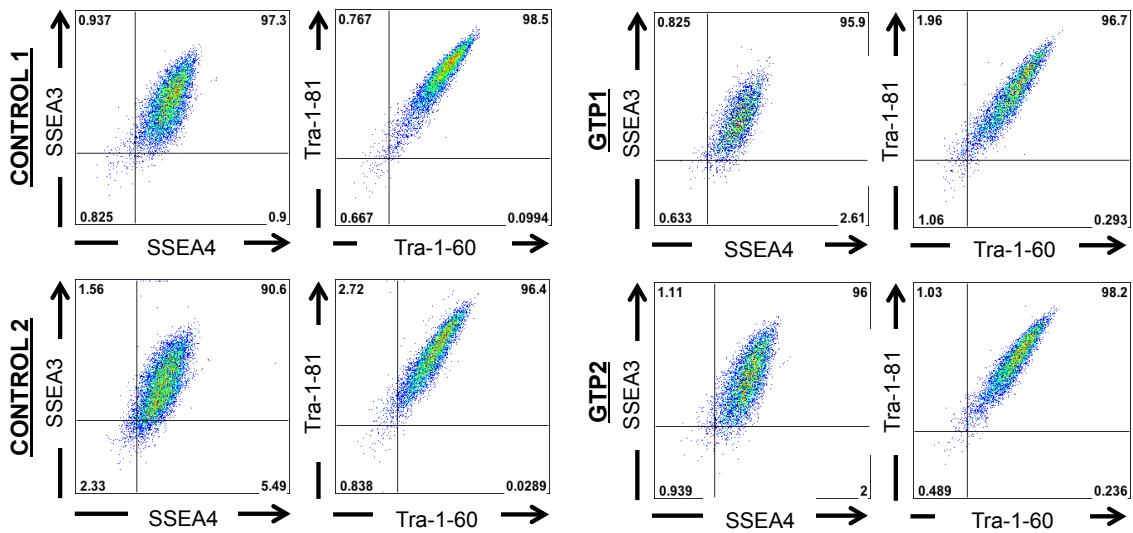

**Supplemental Figure 1. Characterization of iPS cell lines.**

(A) Karyotypes and generation of all three germ layers in a teratoma assay: ectoderm, endoderm, and mesoderm (original magnification, X20-40). WTPB2-3, WTBM1-8, GTPB1-1, GTPB2-1 are the names of the iPS cell lines used in this study. (B) Molecular profiles of iPS cell lines (C1 – Control 1, C2 – Control 2, G1 – GTP1, G2 – GTP2). Real-time PCR analysis shows the expression of pluripotency genes: OCT4, NANOG, cMYC, ABCG2, DNMT3B, KLF4, and SOX2 relative to cyclophilin (Cyclo). (C) Pluripotent surface antigen expression: SSEA3+/SSEA4+ and TRA-1-81+/TRA-1-60+.

Sullivan et al. Supplemental Figure 2

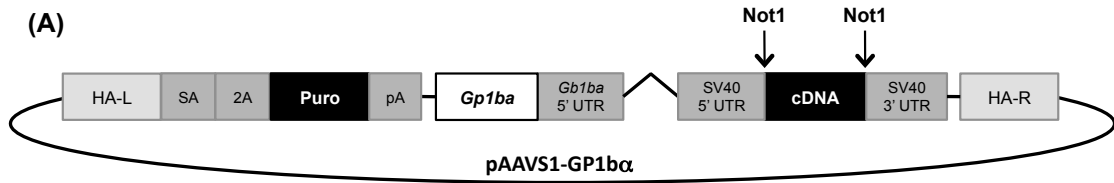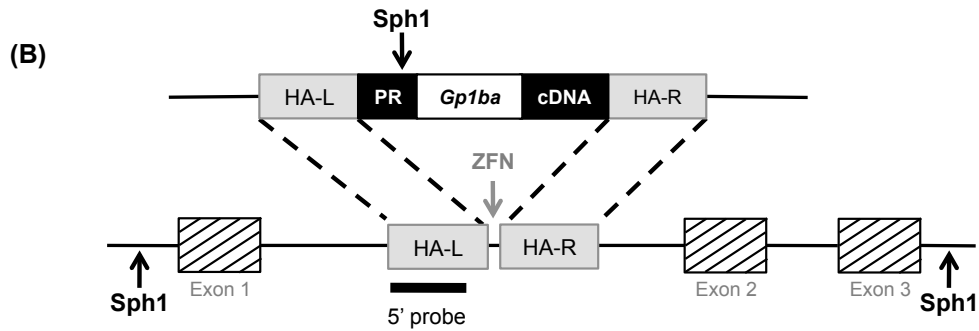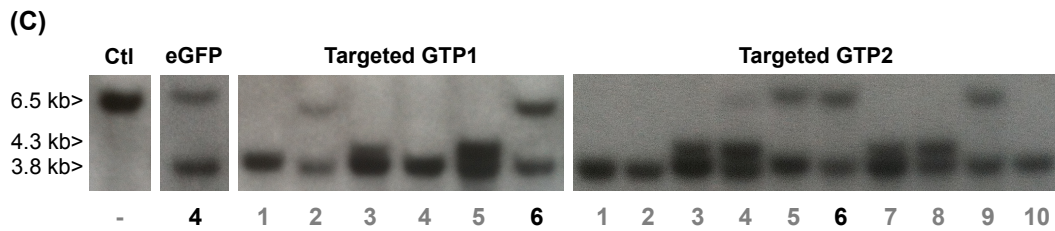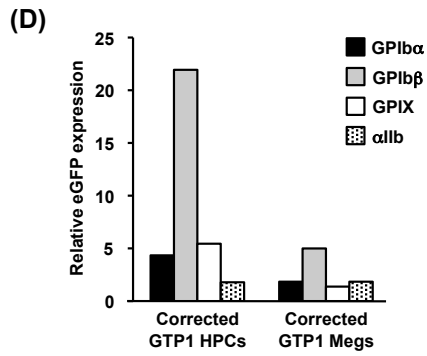



**Supplemental Figure 2. iPS cell targeting strategy with the *pAAVS1-Gp1ba* vector, Southern blot analysis, and eGFP expression relative to endogenous gene expression.**

(A) AAVS1 targeting plasmid (*pAAVS1-Gp1ba*) containing the puromycin resistance gene (Puro) followed by the murine *Gp1ba* promoter/5' UTR linked to the SV40 SA/5'UTR; followed by the coding region of a cDNA of interest; followed by the SV40 3'UTR/pA. The transgene is flanked by AAVS1 homologous sequences (HA-L: homology arm left, HA-R: homology arm right). (B) Integration site of the transgenic construct within the AAVS1 locus (1<sup>st</sup> intron of *PPP1R12C*). The grey arrow points to the double-strand DNA break created by site-specific AAVS1 ZFNs. Sph1 restriction sites (black arrows) and internal 5' probe (black bar) are also shown (PR - puromycin resistance gene). (C) Southern blots of a control iPS cell line (Control 2) targeted with the *Gp1ba* promoter construct driving eGFP and GTP1 and GTP2 iPS cells targeted with the *Gp1ba* promoter construct driving  $\alpha$ IIb cDNA. A 6.5 kb fragment is the untargeted AAVS1 allele; a 3.8 kb fragment is the targeted AAVS1 allele<sup>9</sup>; and a 4.3 kb fragment is the non-homologous insertion of plasmid DNA<sup>10</sup>. Hemizygous insertions are represented by both the 6.5 and 3.8 kb fragments (~30% for selected GT clones). Homozygous insertions are represented by a single 3.8 kb fragment (~30% for selected GT clones). ~40% of selected GT clones demonstrated non-homologous insertion of plasmid DNA. Lanes are noted as follows: “–” for an untargeted clone; numbers under blot are for all clones tested; and bold numbers are the eGFP, GTP1, and GTP2 clones studied in this paper. (D) mRNA expression of eGFP relative to endogenous GPIb $\alpha$ , GPIb $\beta$ , GPIX, and  $\alpha$ IIb in iPS cell-derived HPCs and megakaryocytes (megs). *Gp1ba*-driven eGFP is expressed ~2 to 5-fold higher than endogenous GPIb $\alpha$ , GPIX, and  $\alpha$ IIb and ~22-fold higher than GPIb $\beta$  in HPCs. In megakaryocytes, *Gp1ba*-driven eGFP is expressed 5-fold higher than GPIb $\beta$ .

**Sullivan et al. Supplemental Figure 3**

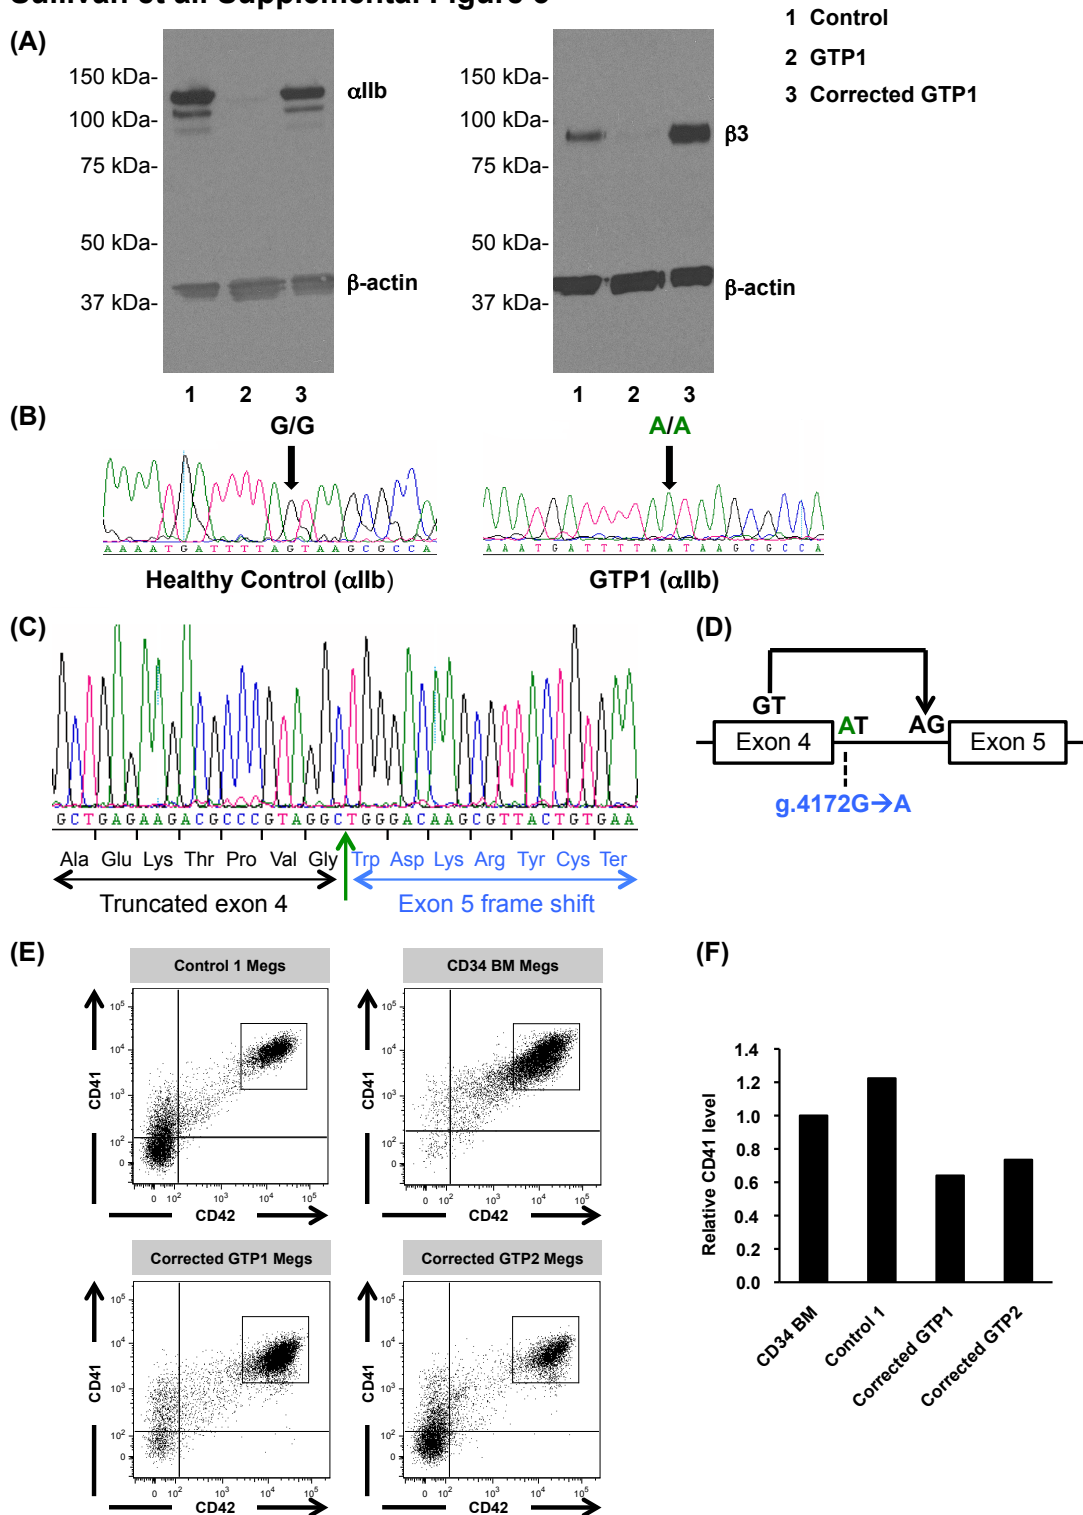

**Supplemental Figure 3. Characterization and correction of the thrombasthenic mutation in GTP1.**

(A) Western blots of  $\alpha$ IIb and  $\beta$ 3 in control and GTP1 iPS cell-derived megakaryocytes. (B) Sequencing of GTP1 *ITGA2B* genomic DNA compared to a normal control shows that the patient is homozygous for an IVS4(+1)G>A (g.3956G>A) mutation at the exon 4 invariant splice donor site. (C) Sequence of  $\alpha$ IIb cDNA derived from GTP1 platelet RNA shows that the mutation results in utilization of a cryptic splice site within exon 4 continuing out-of-frame in exon 5. (D) Schematic representation of the mutation in blue at the splice donor site of exon 4 of the *ITGA2B* gene with utilization of a cryptic exon 4 splice donor site to the normal splice acceptor site of exon 5. (E) Analysis of CD41 versus CD42 expression in enriched human CD34+ bone marrow stem and progenitor cell-derived megakaryocytes (CD34 BM Megs), control iPS cell-derived megakaryocytes, and corrected GT iPSC cell-derived megakaryocytes by flow cytometry. (F) Expression of CD41 of control and corrected GT iPS cell-derived megakaryocytes relative to CD34+ BM-derived megakaryocytes.

**References**

1. Yarovoi HV, Kufirin D, Eslin DE, et al. Factor VIII ectopically expressed in platelets: efficacy in hemophilia A treatment. *Blood*. 2003 Dec 1;102(12):4006-13.
2. Poncz M, Eisman R, Heidenreich R, et al. Structure of the platelet membrane glycoprotein IIb Homology to the alpha subunits of the vitronectin and fibronectin membrane receptors. *J Biol Chem*. 1987 Jun 25;262(18):8476-82.
3. Heckman KL, Pease LR. Gene splicing and mutagenesis by PCR-driven overlap extension. *Nat Protoc*. 2007;2(4):924-32.
4. Sommer AG, Rozelle SS, Sullivan S, et al. Generation of human induced pluripotent stem cells from peripheral blood using the STEMCCA lentiviral vector. *J Vis Exp*. 2012 Oct 31.
5. Chou ST, Byrska-Bishop M, Tober JM, et al. Trisomy 21-associated defects in human primitive hematopoiesis revealed through induced pluripotent stem cells. *Proc Natl Acad Sci U S A*. 2012 Oct 23;109(43):17573-8.
6. Somers A, Jean JC, Sommer CA, et al. Generation of transgene-free lung disease-specific human induced pluripotent stem cells using a single excisable lentiviral stem cell cassette. *Stem Cells*. 2010 Oct;28(10):1728-40.
7. Polo JM, Liu S, Figueroa ME, et al. Cell type of origin influences the molecular and functional properties of mouse induced pluripotent stem cells. *Nature Biotechnology*. 2010;28:848-855.
8. Mills JA, Wang K, Paluru P, et al. Clonal genetic and hematopoietic heterogeneity among human induced pluripotent stem cell lines. *Blood*. 2013 Sep 19;122(12):2047-51.
9. Hockemeyer D, Soldner F, Beard C, et al. Efficient targeting of expressed and silent genes in human ESCs and iPSCs using zinc-finger nucleases. *Nat Biotechnol*. 2009 Sep;27(9):851-7.
10. Zou J, Sweeney CL, Chou BK, et al. Oxidase-deficient neutrophils from X-linked chronic granulomatous disease iPS cells: functional correction by zinc finger nuclease-mediated safe harbor targeting. *Blood*. 2011 May 26;117(21):5561-72.
11. Cortin V, Pineault N, Garnier A. Ex vivo megakaryocyte expansion and platelet production from human cord blood stem cells. *Methods Mol Biol*. 2009;482:109-26.
12. Shattil SJ, Hoxie JA, Cunningham M, Brass LF. Changes in the platelet membrane glycoprotein IIb/IIIa complex during platelet activation. *J Biol Chem*. 1985 Sep 15;260(20):11107-14.
13. Gaur M, Kamata T, Wang S, et al. Megakaryocytes derived from human embryonic stem cells: a genetically tractable system to study megakaryocytopoiesis and integrin function. *J Thromb Haemost*. 2006 Feb;4(2):436-42.
